# Supplementary material
Source: Elsevier journal article supplement (https://rcastoragev2.blob.core.windows.net/58483142ce464c44c83fe99989fc4865/mmc1.pdf)
Supplement: mmc1 [file mmc1.pdf]

## **Supplemental Information**

### **Principles of signaling pathway modulation for enhancing human naive pluripotency induction**

**Jonathan Bayerl, Muneef Ayyash, Tom Shani, Yair Shlomo Manor, Ohad Gafni, Rada Massarwa, Yael Kalma, Alejandro Aguilera-Castrejon, Mirie Zerbib, Hadar Amir, Daoud Sheban, Shay Geula, Nofar Mor, Leehee Weinberger, Segev Naveh Tassa, Vladislav Krupalnik, Bernardo Oldak, Nir Livnat, Shadi Tarazi, Shadi Tawil, Emilie Wildschutz, Shahd Ashouokhi, Lior Lasman, Varda Rotter, Suhair Hanna, Dalit Ben-Yosef, Noa Novershtern, Sergey Viukov, and Jacob H. Hanna**

## **Supplemental Information**

### **Principles of signaling pathway modulation for enhancing human naive pluripotency induction**

**Jonathan Bayerl, Muneef Ayyash, Tom Shani, Yair Manor, Ohad Gafni, Rada Massarwa, Yael Kalma, Alejandro Aguilera-Castrejon, Mirie Zerbib, Hadar Amir, Daoud Sheban, Shay Geula, Nofar Mor, Leehee Weinberger, Segev Naveh-Tassa, Vladislav Krupalnik, Bernardo Oldak, Nir Livnat, Shadi Tarazi, Shadi Tawil, Emilie Wildschutz, Shahd Ashouokhi, Lior Lasman, Varda Rotter, Suhair Hanna, Dalit Ben-Yosef, Noa Novershtern, Sergey Viukov, and Jacob H. Hanna**

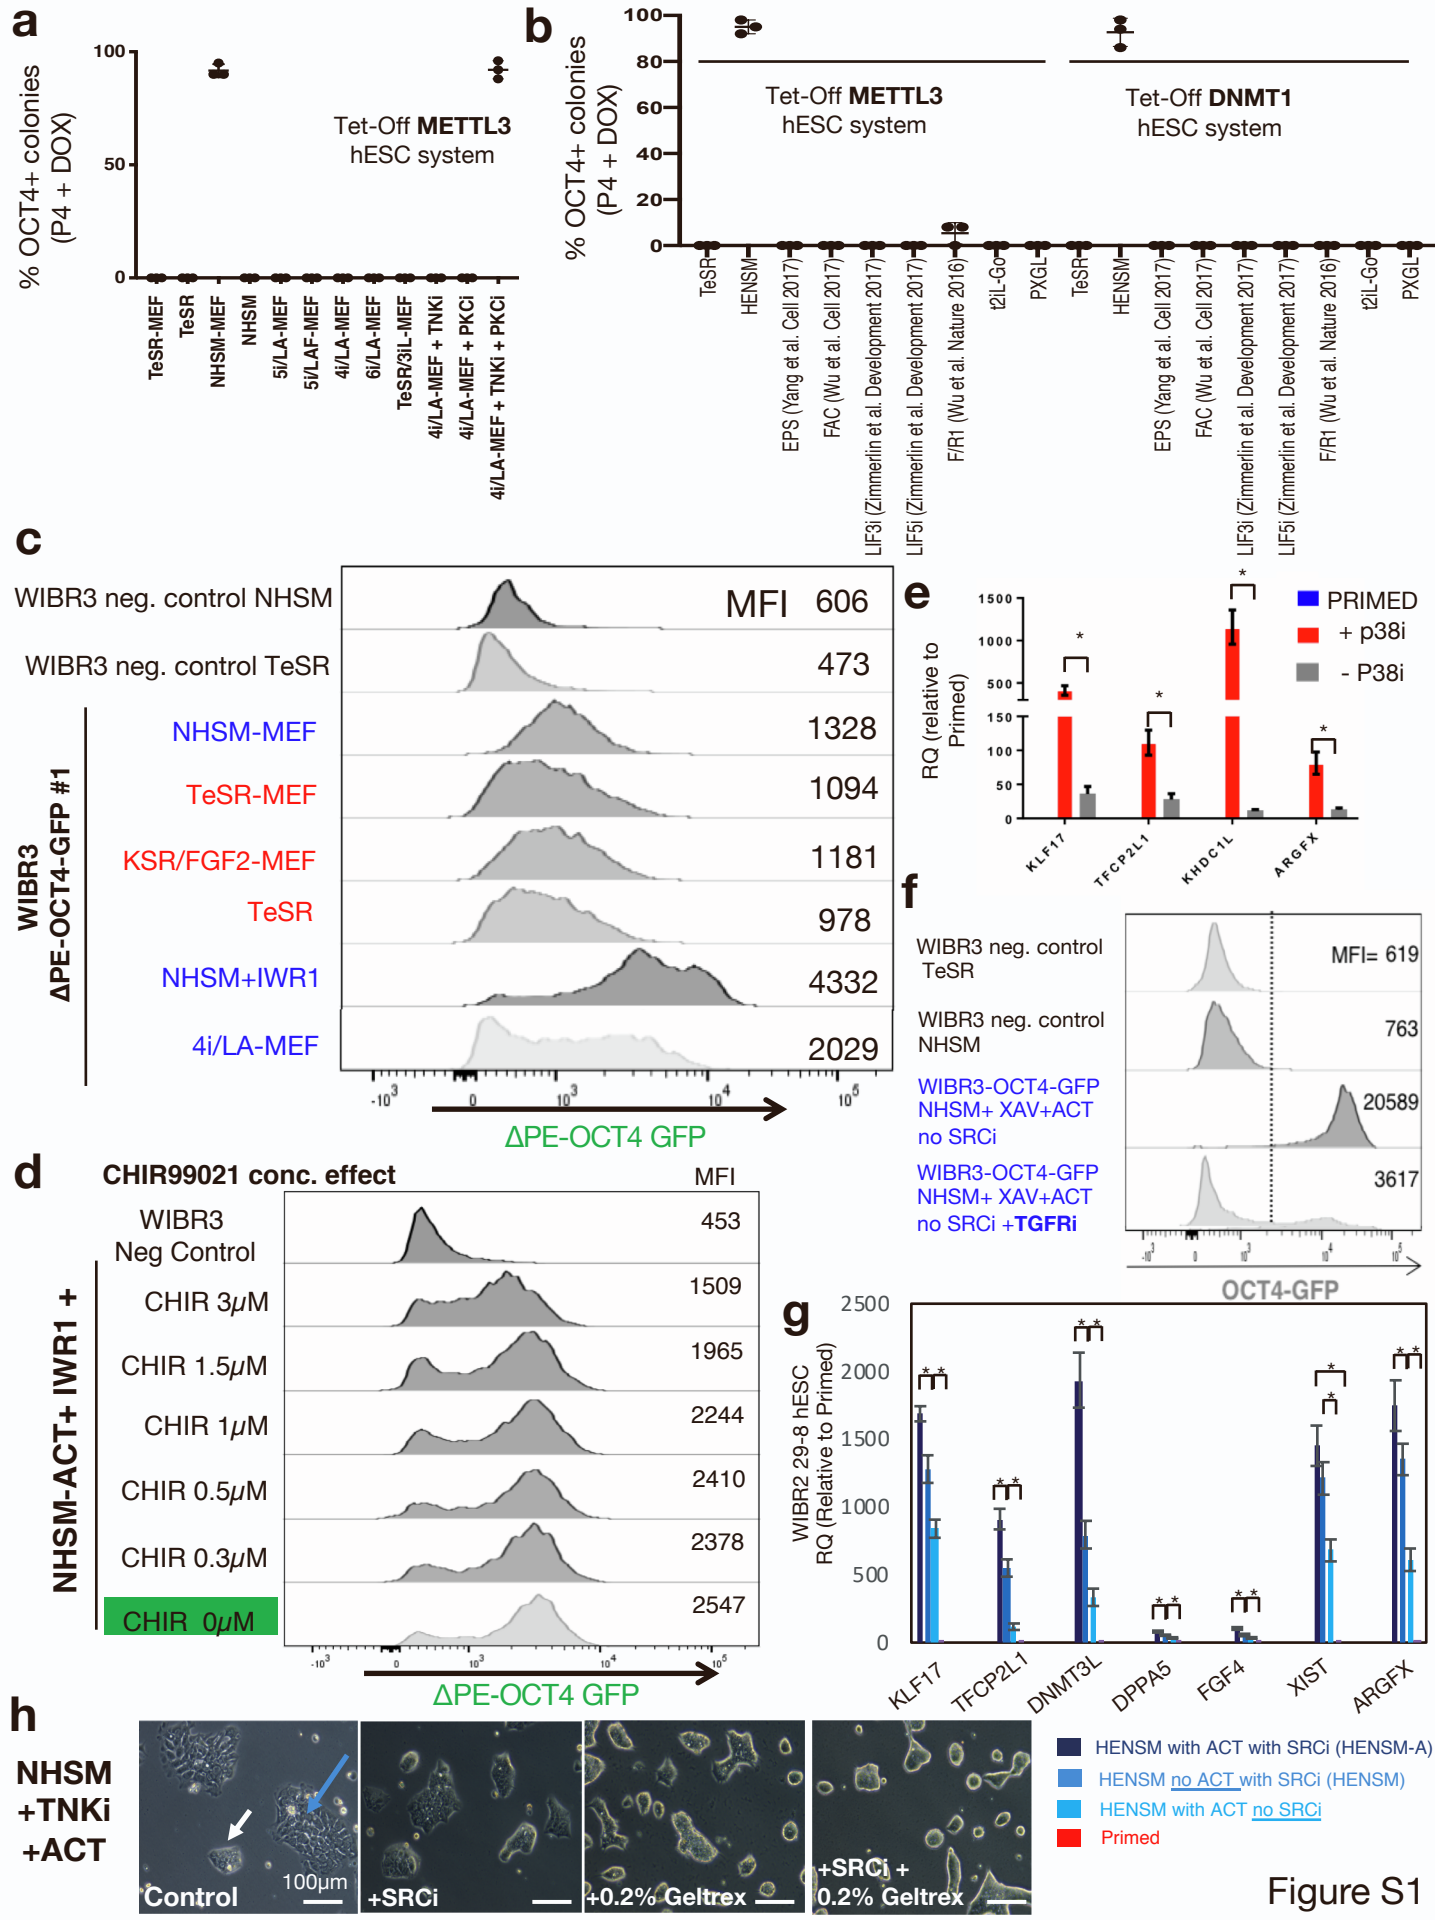

Figure S1

**Figure S1. Reporter systems for screening for enhanced human naïve pluripotency conditions.**

Related to Figure 1.

**a.** W3G4 METTL3 TET-OFF cells were transitioned in the presence of DOX in the indicated growth conditions for up to 4 passages and stained for OCT4 to quantify percentage of cells that retained their pluripotency. Graph shows that NHSM conditions without feeder cells and other previously described naïve and primed conditions for human ESCs/iPSCs failed to maintain pluripotency in majority of cells expanded in the presence of Dox. **b.** METTL3 TET-OFF and DNMT1 TET-OFF primed cells were transitioned in the presence of DOX for up to 4 passages in different previously published naïve and primed conditions and stained for OCT4 to quantify percentage of cells that retained their pluripotency. **c.** FACS quantification of  $\Delta$ PE-OCT4-GFP knock in naïve pluripotency reporter, in variety of primed (red) and naïve conditions (blue). Mean fluorescence intensity values (MFI) are indicated. Figure shows that supplementing NHSM conditions with TNKi like IWR1 small molecules boosts expression of GFP suggesting enhancement of naivety characteristics. **d.** Quantification of  $\Delta$ PE-OCT4-GFP knock in naïve pluripotency reporter, in optimized naïve conditions and various concentrations of GSK3 inhibitor that leads to WNT activation (CHIR99021 is used as GSK3 inhibitor and is abbreviated as CHIR). Figure indicates that CHIR addition negatively influences human naïve pluripotency as determined by  $\Delta$ PE-OCT4-GFP intensity. **e.** RT-PCR analysis for naïve pluripotency markers in HENSM conditions with and without P38i/JNKi (BIRB0796). Values were normalized to ACTIN and values in primed conditions were set as 1. \*t-test  $p$  Value < 0.01. **f.** FACS analysis for OCT4-GFP pluripotency reporter expression following addition of TGFRi. In optimized NHSM conditions that still lack SRCi, pluripotency is rapidly lost upon inhibition of TGFRi. **g.** RT-PCR analysis for naïve pluripotency markers in the indicated HENSM conditions with and without ACTIVIN or SRCi. Values were normalized to ACTIN and values in primed conditions were set as 1. \*t-test  $p$  Value < 0.01. **h.** Phase-contrast images showing how supplementation of 0.2% Geltrex (Life Technologies) in the growth media and SRCi additively enhance dome- like morphology of human naïve PSCs in HENSM conditions optimized herein.



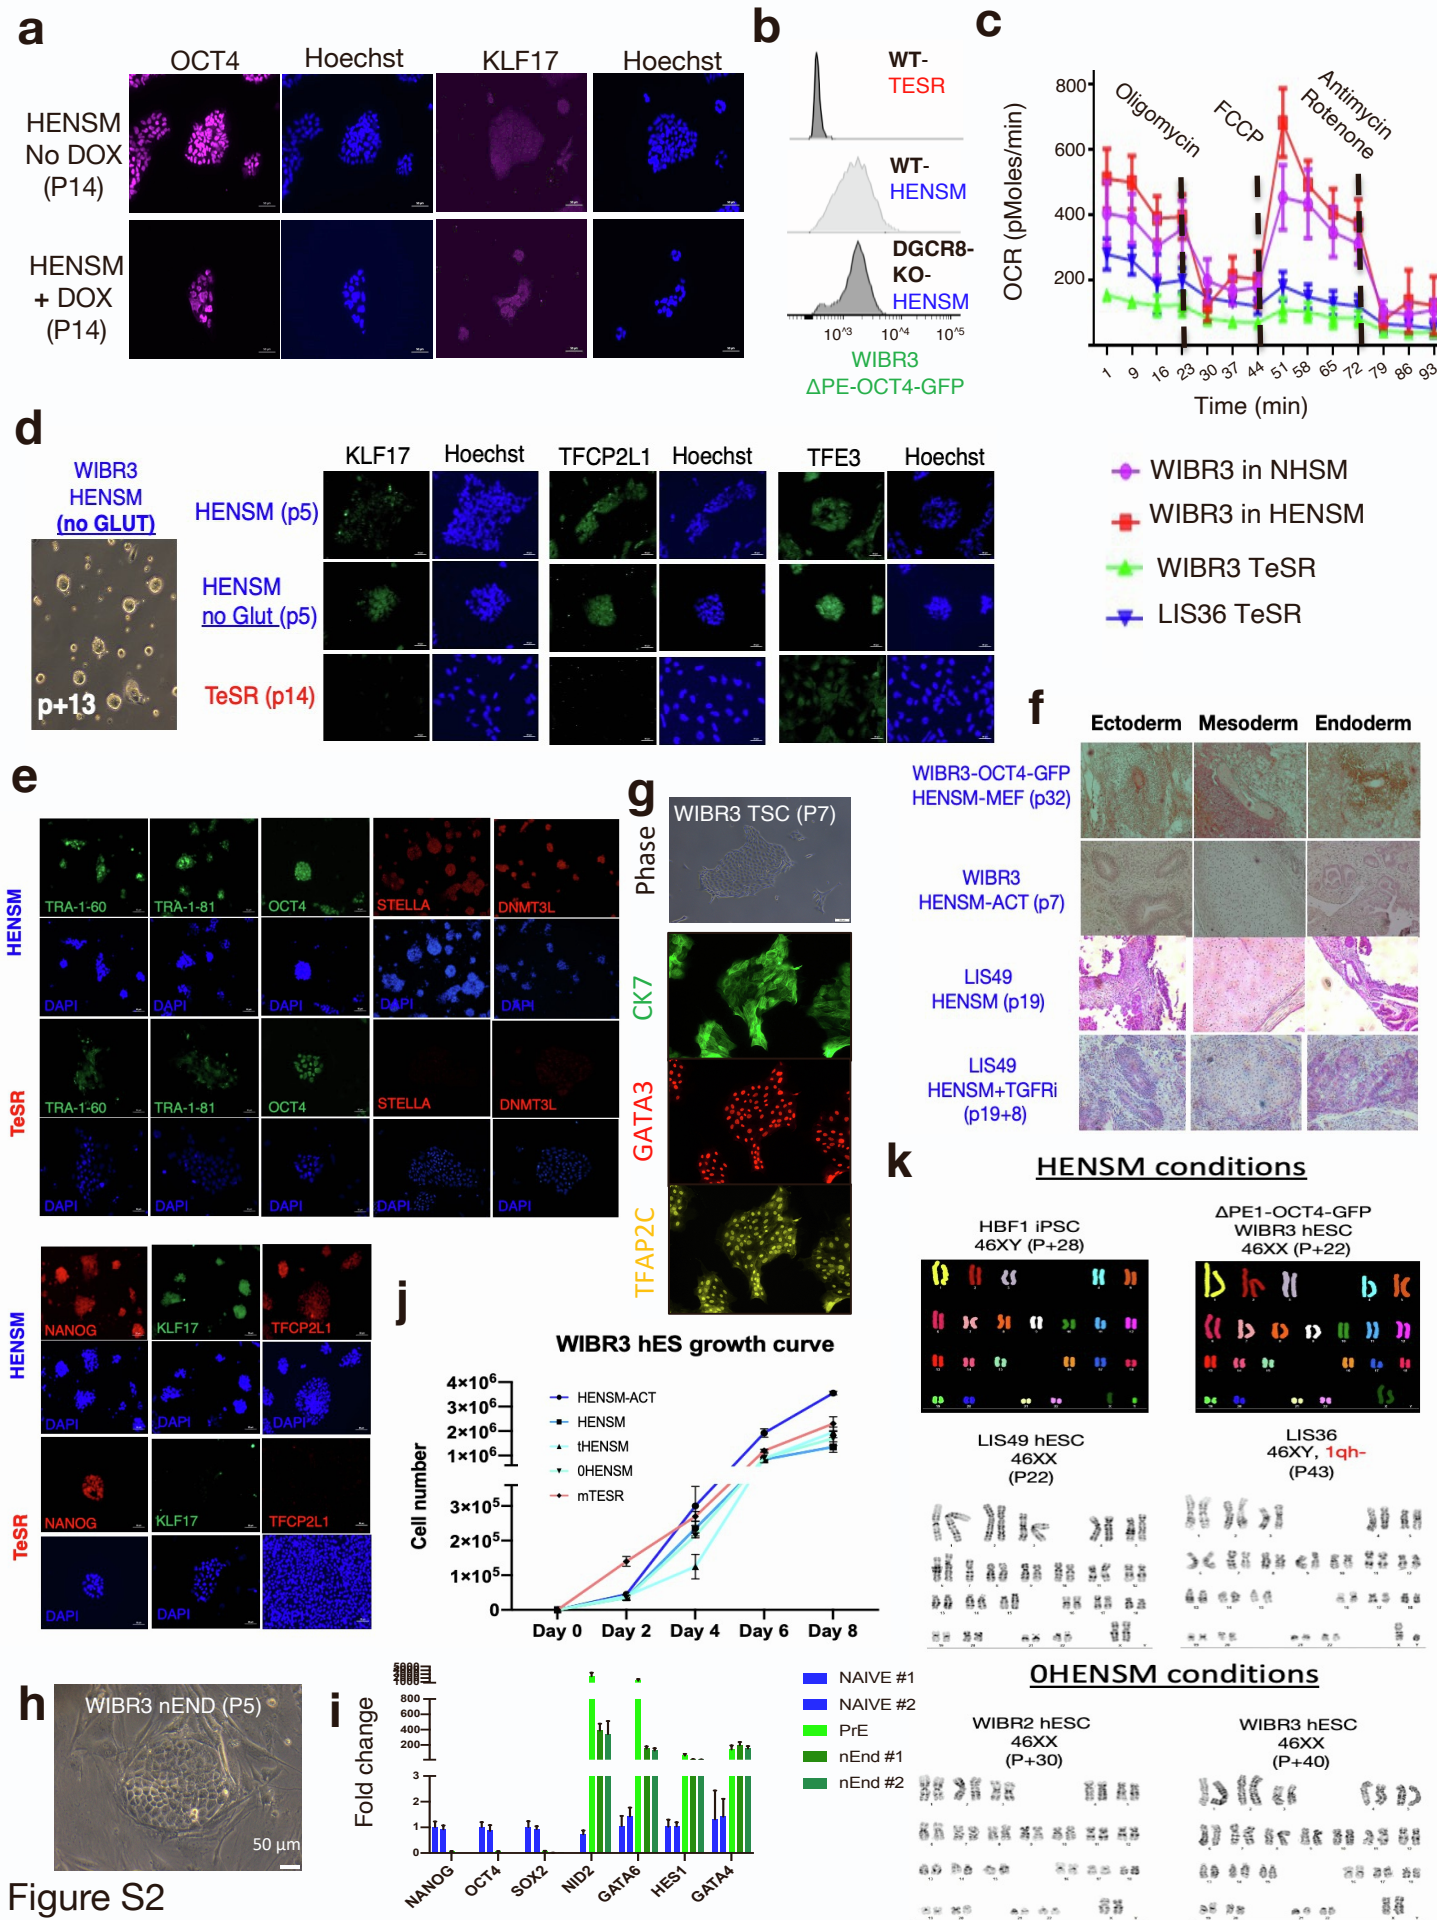

Figure S2

**Figure S2. Cell characterization in HENSM conditions.** Related to Figure 2.

**a.** Immunostaining for W3G4 before and after DOX validating METTL3 protein downregulation after DOX addition in HENSM. **b.** FACS analysis showing preservation of  $\Delta$ PE-OCT4-GFP naïve marker expression in both WT and DGCR8 KO human ESCs expanded in HENSM conditions. **c.** Oxygen consumption rate (OCR) measurement by Seahorse platform in different conditions. **d.** Representative phase contrast and fluorescent images of human cells expanded in HENSM conditions with and without exogenous L-Glutamine (GLUT). TeSR primed human ESCs were used as controls. **e.** Representative immunostaining for pluripotency markers in HENSM conditions are shown for LIS49 hESC line. Primed cells expanded in TeSR conditions are used as controls. **f.** Mature teratoma images are shown following their derivation from the indicated cell lines expanded in the different indicated conditions. Please note that without exception, all teratomas were formed following direct subcutaneous injections after being expanded only in the indicated media condition and without the need for any expansion in other primed conditions *in vitro* before injection. **g.** Phase-contrast image and immunostaining validating TSC identify of a line derived from WIBR3 hESC expanded in HENSM. **h.** Differentiation of WIBR3 naïve hPSCs in HENSM into naïve extra-embryonic endoderm (nEnd) cells. Phase-contrast bright-field image of differentiated nEnd cells on MEFs is shown. **i.** RT-qPCR analysis of pluripotency (NANOG, OCT4 and SOX2) and endoderm markers (NID2, GATA6, HES1 and GATA4) in naïve PSC, primitive endoderm (PrE) and naïve endoderm (nEnd) cells illustrating induction of endoderm signatures and loss of pluripotency in differentiated PrE and nEnd cells. Naïve #1 HENSM sample was set as 1. Two independent biological replicates are shown for naïve hPSCs and naïve endoderm cells. **j.** Representative growth rate curve for different naïve and primed conditions. **k.** Metaphase chromosomal spreads are shown from the indicated human ESC and iPSC lines expanded in HENSM and OHENSM based conditions. Passage numbers are indicated throughout.

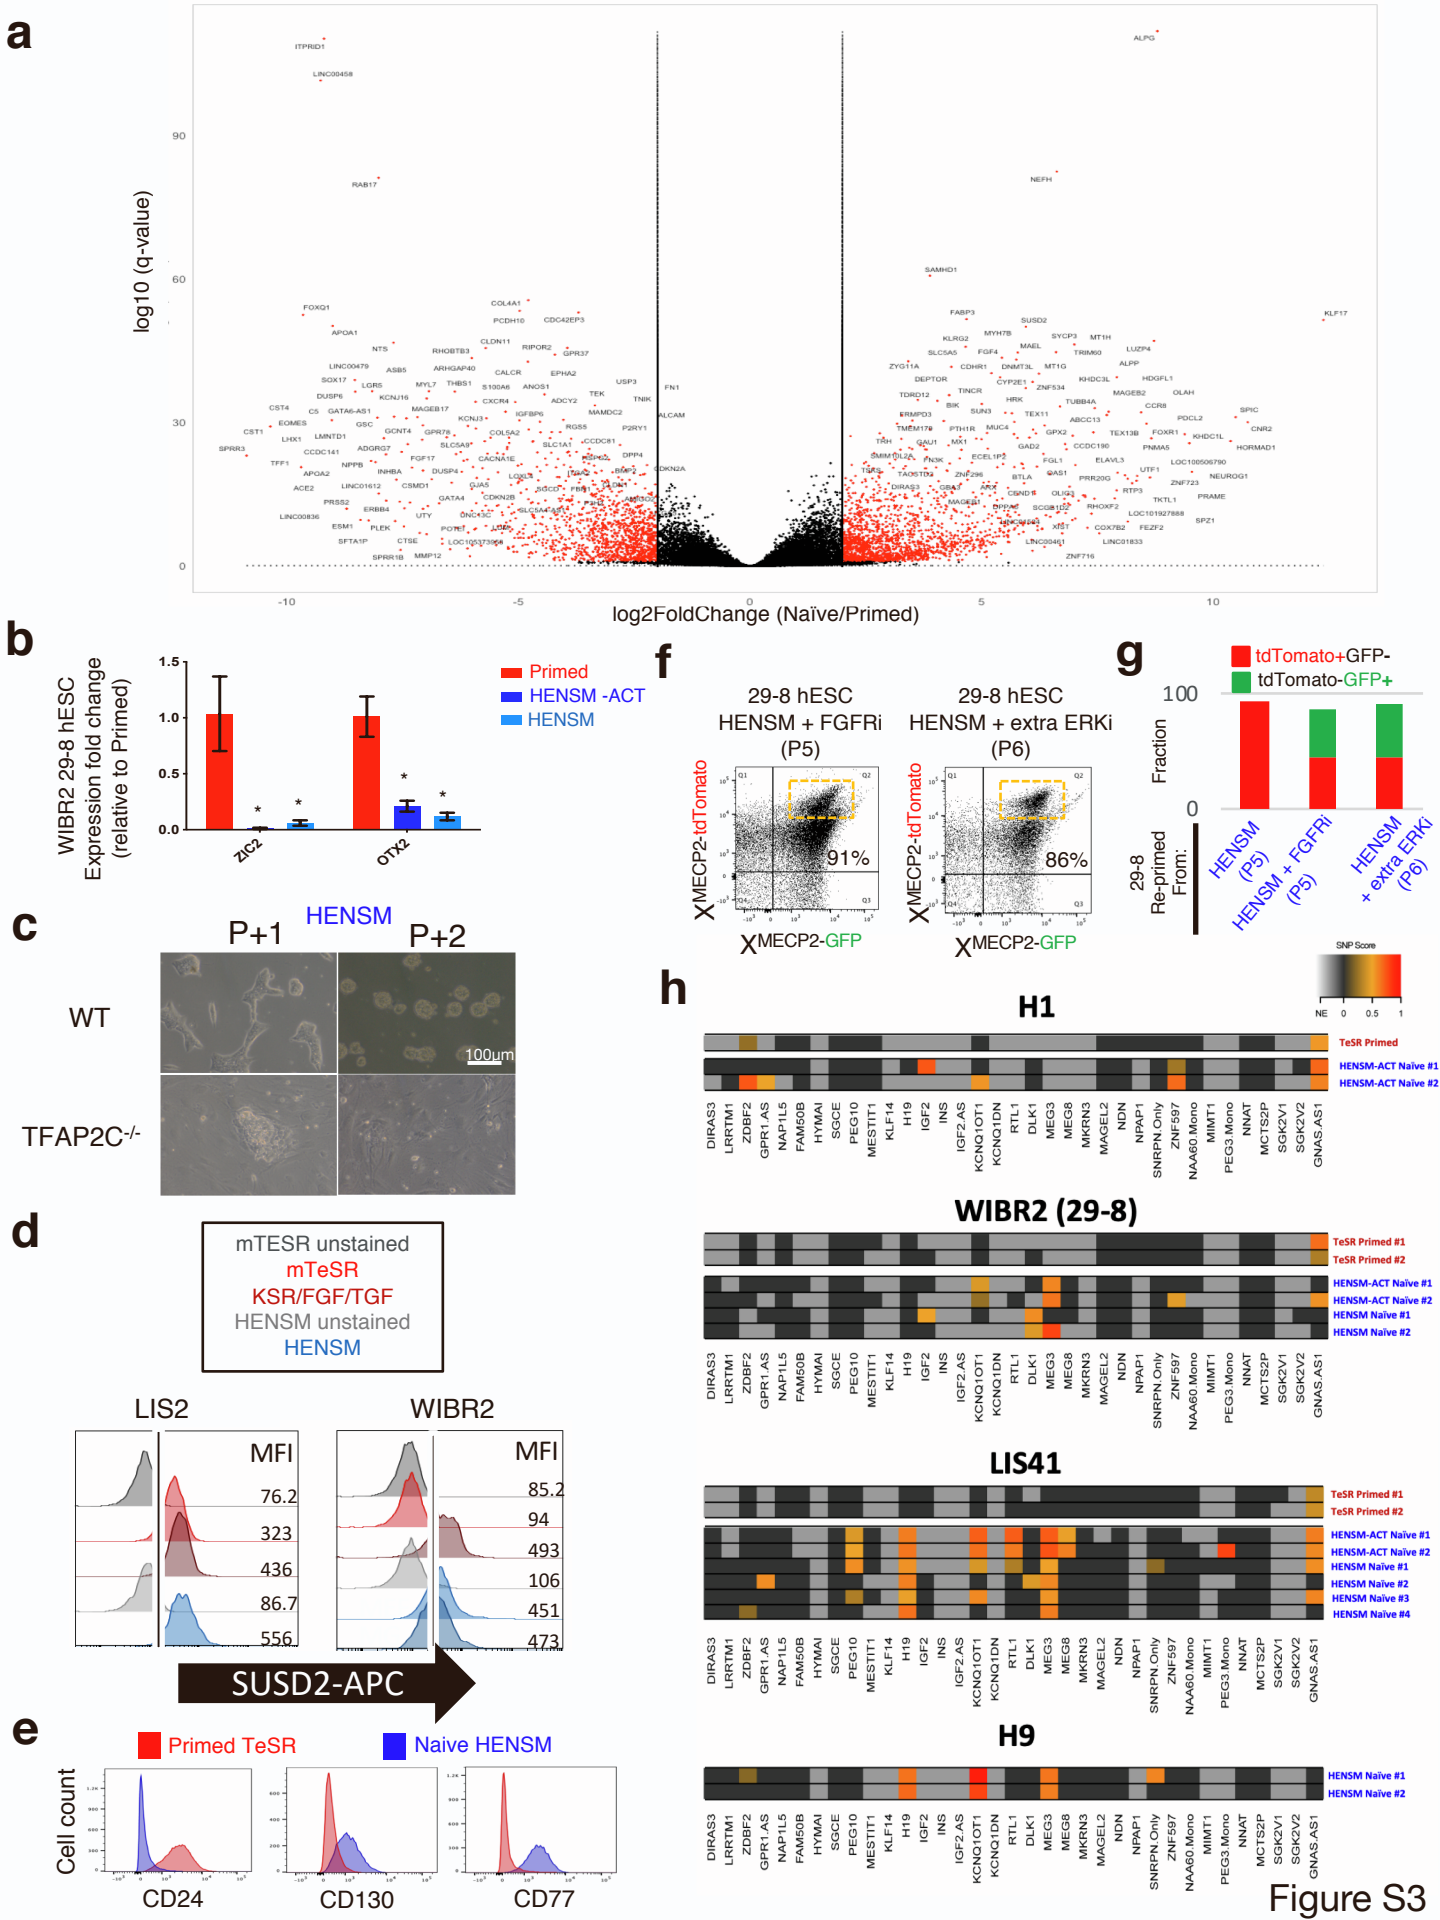

**Figure S3. Differentially expressed genes between human HENSM naïve and primed states.** Related to Figure 3.

**a.** Volcano plot comparing change in expression of all genes ( $\log_2(\text{Naïve HENSM}/\text{primed Fold-Change})$  in x-axis), to their statistic ( $-\log_{10}(\text{q-value})$  in y-axis). Differentially expressed genes ( $\text{Fold-change} > 2 (< 0.5)$ ,  $p\text{-adjusted} < 0.1$ ) are marked in red. Extreme genes are highlighted. **b.** RT-PCR validation of expression of ZIC2 and OTX2. \*t-test  $p$  Value  $< 0.001$ . **c.** Phase-contrast images showing loss of TFAP2C KO pluripotent cells expansion within 2 passages in HENSM conditions. **d.** FACS staining results on different primed (red colors) and HENSM conditions for SUSD2 expression. MFI values are indicated and compared to matched unstained negative controls. **e.** FACS analysis for expression levels of the indicated surface markers. CD130 and CD77 are induced in HENSM conditions consistent with their previous designation as markers of human naïve pluripotency (Collier et al. Cell Stem Cell 2017). CD24 is depleted in HENSM naïve conditions as expected. **f.** FACS results following using WIBR2 (female 46XX) 29-8 hESC line that carries GFP and tdTomato on each of the X chromosomes in the MECP2 locus. Parental 29-8 clone has the X chromosome carrying GFP allele in the active state, and thus is positive only for GFP and negative for tdTomato in the primed state. Upon transfer to HENSM, HENSM +FGFRi (PD173074 0.75microM) or HENSM-extra ERKi (1.25microM PD0325901), cells turn on both X chromosomes and thus become double positive for both fluorescent markers (GFP and tdTomato). tdTomato-high fraction is highlighted in orange boxed area. **g.** Naïve 29-8 cells were reprimed in FGF/KSR conditions for 3 passages from the different indicated naïve conditions. Random inactivation (presence of both single positive GFP or tdTomato cells) was evident upon additional FGFR signaling inhibition, consistent with a recent report. **h.** SNP based analysis of loss of imprinting (LOI) in hPSCs. Heatmap of biallelic expression including the complete list of imprinted genes in hPSC samples. Genes are arranged according to their genomic proximity. NE - not expressed (FPKM  $< 0.2$ ).



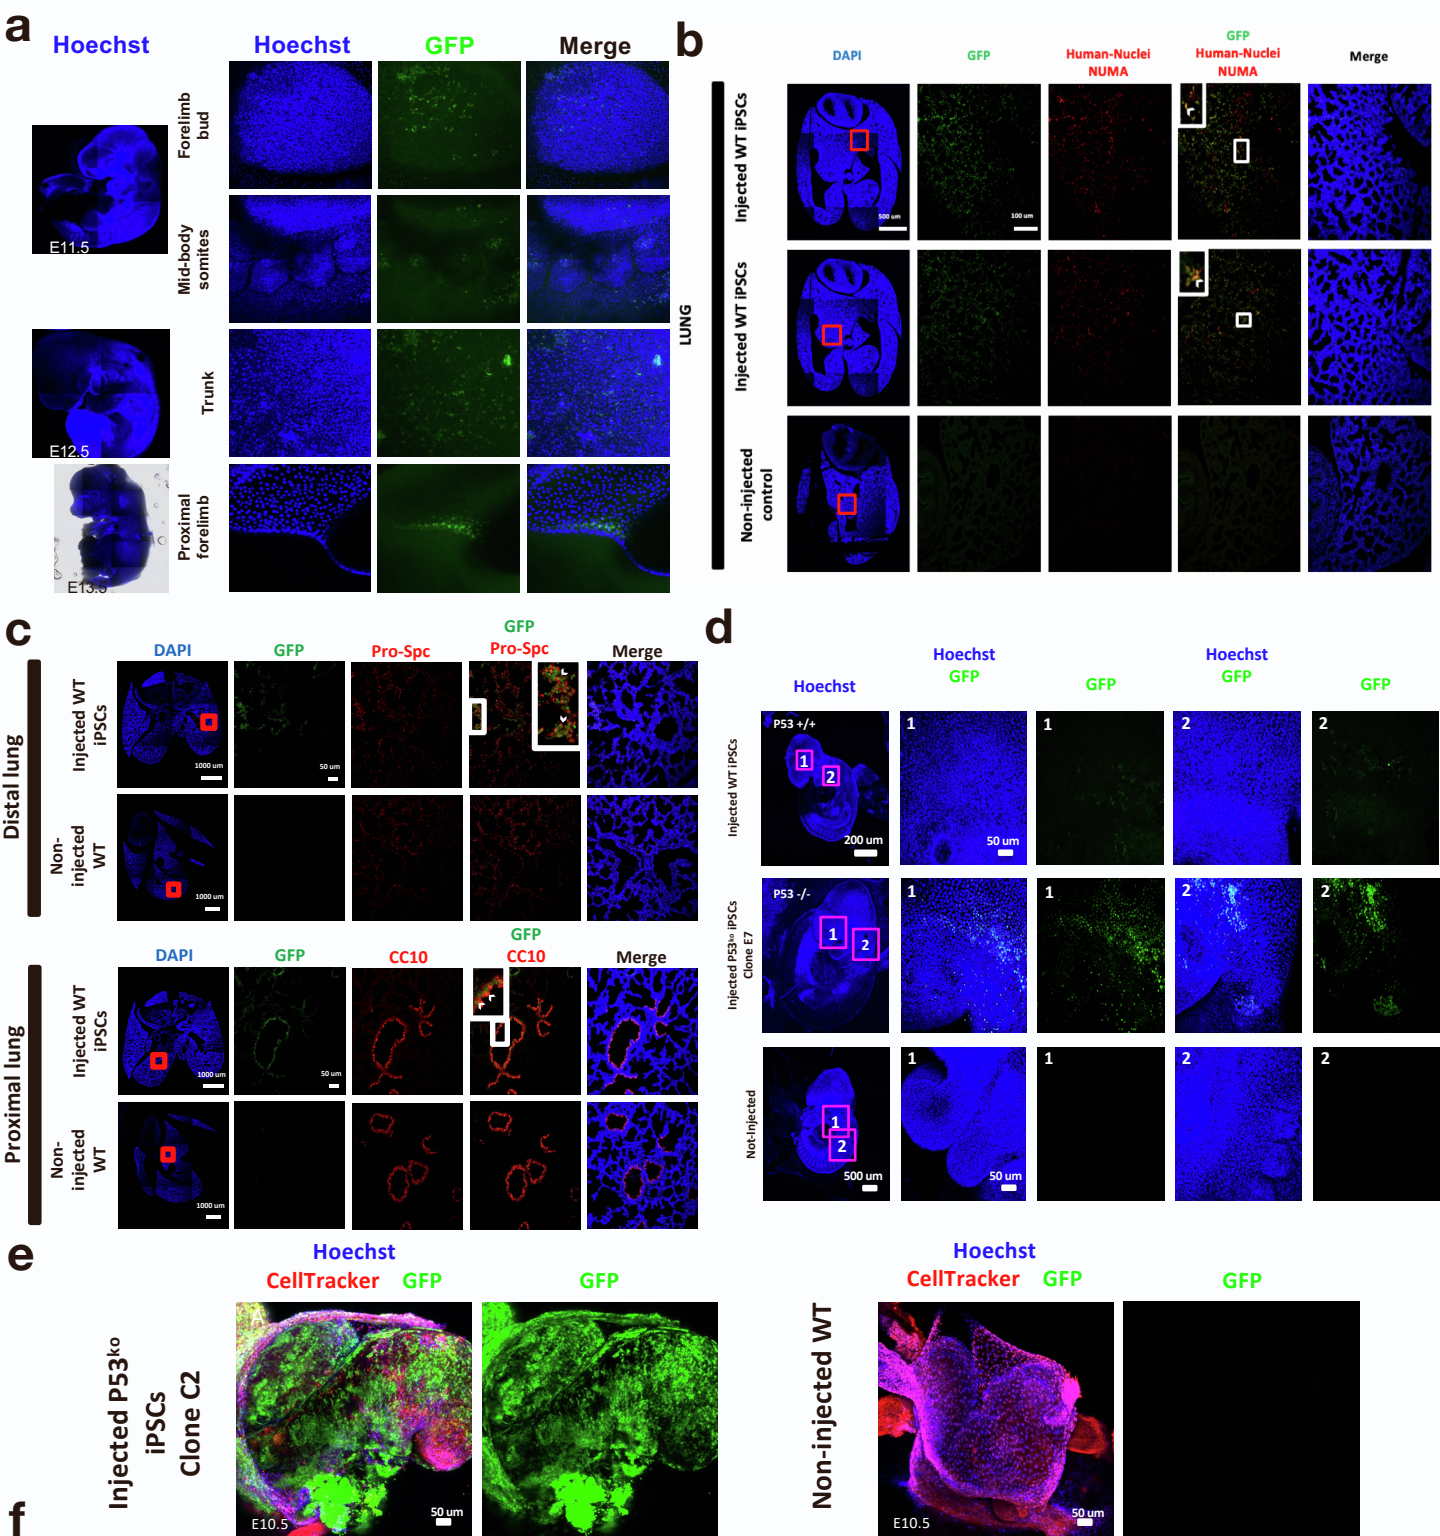

| Cell lines         | Average chimeric embryos per micro-injection batch | Range % of human cells observed within chimeric mouse embryos | Embryo age for this analysis |
|--------------------|----------------------------------------------------|---------------------------------------------------------------|------------------------------|
| Naïve WT hiPSCs    | 0.8 (n=9)                                          | 1-2%                                                          | E9.5 – E10.5                 |
| Naïve P53 KO hiPSC | 3.6 (n=13)                                         | 1-20%                                                         | E9.5 – E10.5                 |

**Figure S4.**

**Figure S4. P53 depleted human naïve pluripotent stem cells are more competent for interspecies chimerism.** Related to Figure 4. **a.** Representative images of whole mount *in toto* microscopy of chimaeric embryos over several developmental stages (E11.5 until E13.5). Panels on the right are zoomed-in regions of tiles on the left side. Hoechst was used as counterstain and anti-GFP staining used to trace human iPSC-derived descendants. **b.** Frozen tissue sections of E17.5 chimaeric embryos were stained for GFP and Human-Nuclei to confirm human origin identity. Non-injected embryos served as negative control. GFP, Human-Nuclei, overlap as well as merged are zoomed-in regions of lung tissue depicted in red squares in the tiles. White arrowheads in insets point out co-localization between GFP and Human-Nuclei. GFP, green fluorescent protein; WT, wild type; iPSC, induced pluripotent stem cell. Tile scale bar 500 um. Zoomed-in scale bar 100 um. **c.** Representative images of frozen tissue sections of E17.5 chimaeric embryos were stained for GFP and Pro-Spc for lung-specific alveolar-surfactant secreting cells. Non-injected embryos served as negative control. GFP, Pro-Spc, overlap as well as merged are zoomed-in regions of lung tissue depicted in red squares in the tiles. White arrowheads in insets point out co-localization between GFP and Pro-Spc or CC10 (Clara-cell 10) lung cell markers. GFP, green fluorescent protein; WT, wild type; Pro-Spc, prosurfactant Protein C. Tile scale bar 1000 um. Zoomed-in scale bar 50 um. **d.** Boost in cell chimerism contribution by depleting P53 in hiPSCs before microinjection. Representative images depicting integration of P53KO GFP-labelled hiPSCs into different locations within developing E9.5/E10.5 mouse embryo in comparison to WT GFP<sup>+</sup>-cells and non-injected embryos used as negative controls. Red squares in the first column represent zoomed-in areas shown in the following images 1 and 2. Tile scale bar 200 um. Inset scale bar 50 um. **e.** Abnormally developed E10.5 chimaeric embryo due to very high GFP contribution in comparison to non-injected WT embryo lacking any GFP signal. Hoechst and CellTracker were used for counterstaining. Scale bar 50 um. **f.** Summarizing table for outcome of injections of different hiPSCs into mouse embryos.

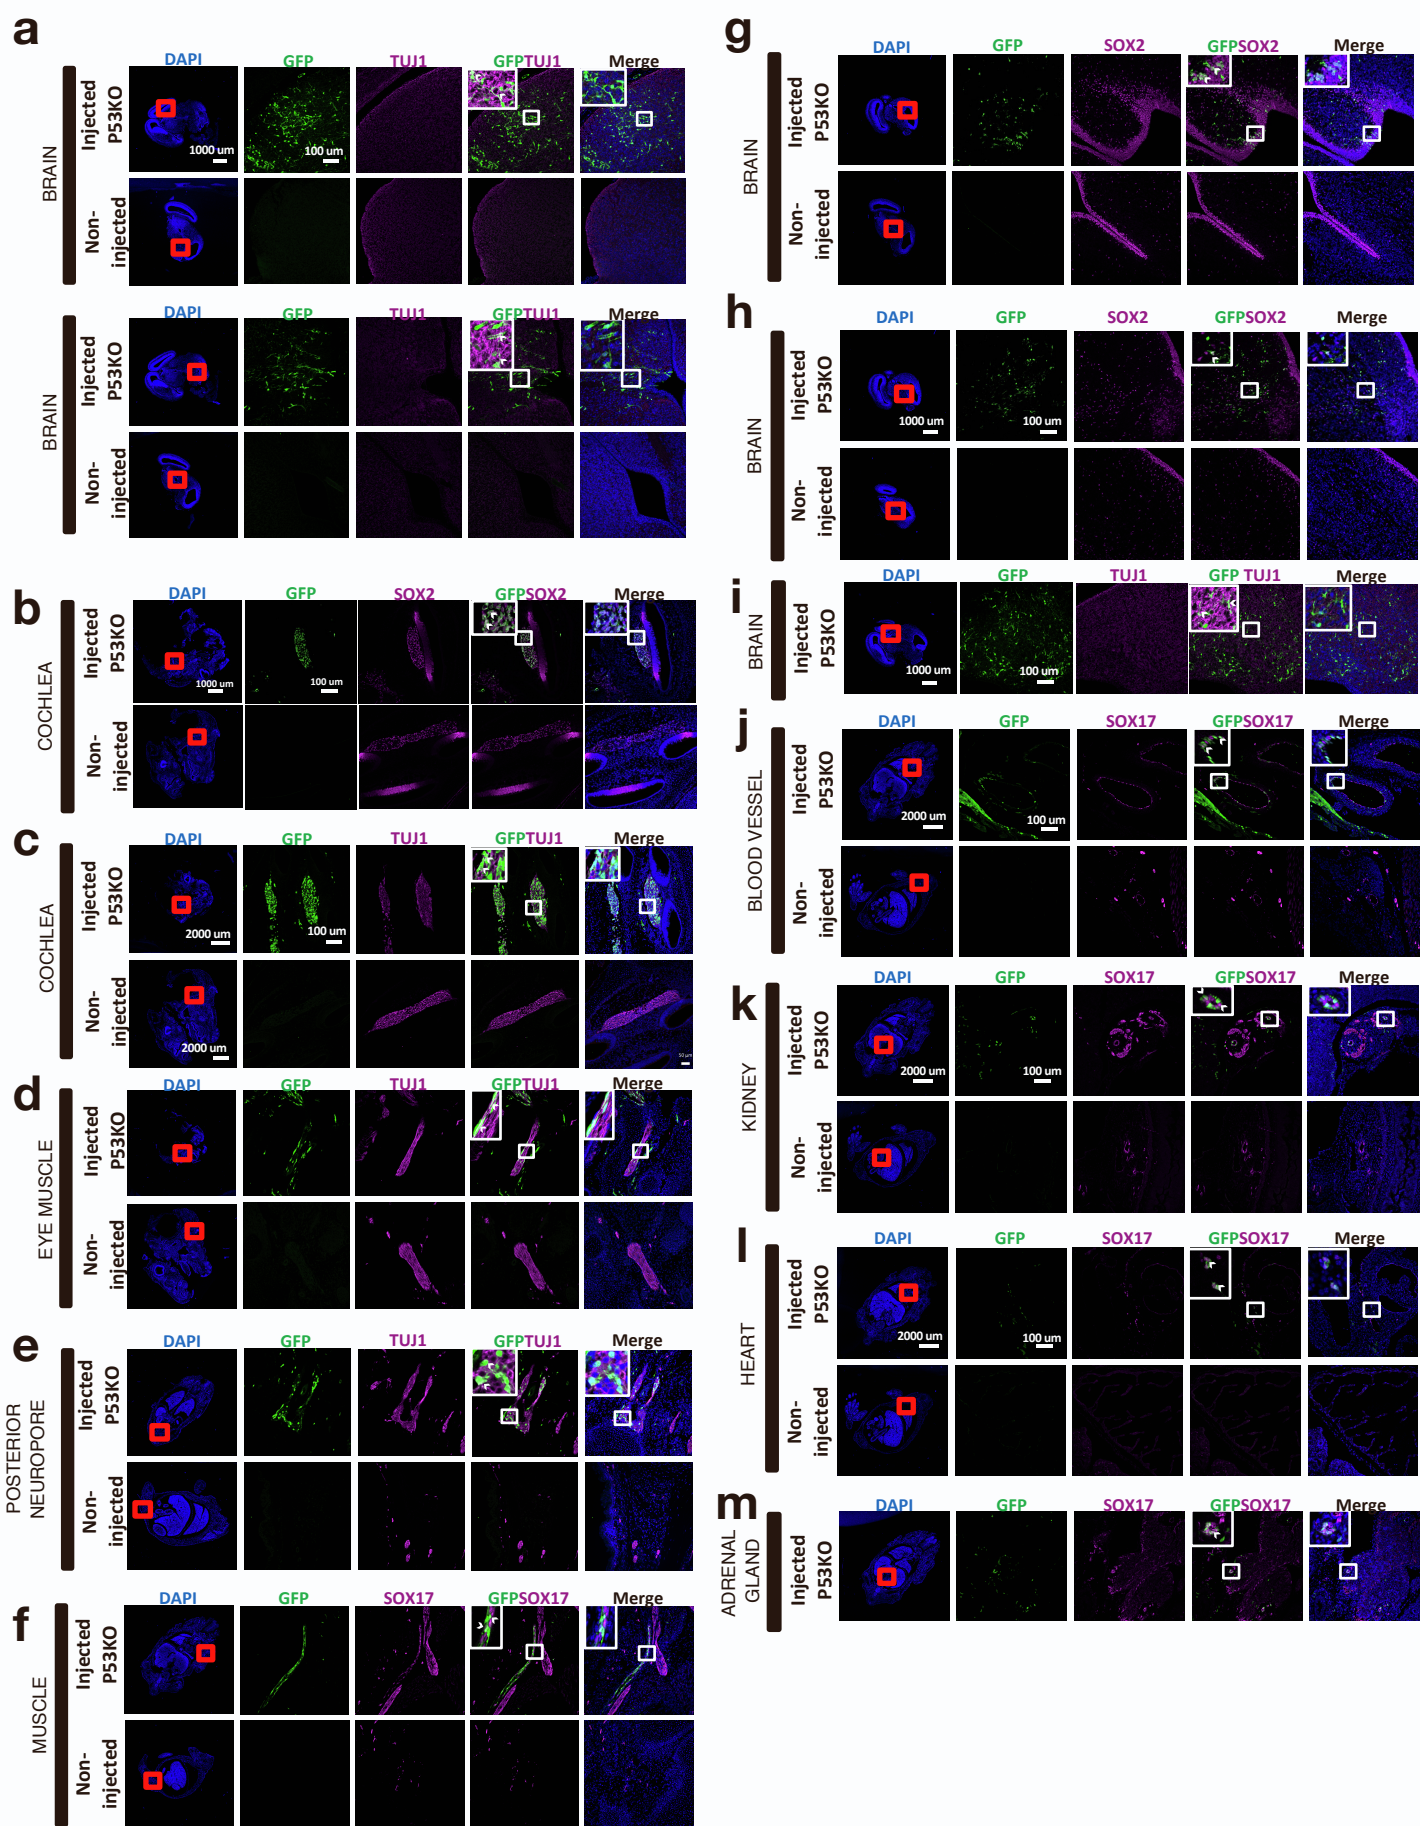

Figure S5.



**Figure S5. Contribution of GFP labeled P53KO hiPSC-derived progeny to various lineages within chimaeric mouse embryos.** Related to Figure 4.

Representative images of IHC staining of injected (upper panels) and non-injected E15.5 mouse embryos (lower panels when included) for (a) brain region by TUJ1, (b,c) cochlea by SOX2, (d,e) eye muscle and posterior neuropore by TUJ1, (f) muscle tissue by SOX17, (g,h) brain by SOX2, (i) brain by TUJ1, (j,k) blood vessels and kidney region by SOX17, (l, m) heart and adrenal gland regions by SOX17 respectively, are shown. GFP serves as human cell tracer of microinjected P53KO hiPSC, and the developmental markers are used to verify proper integration and acquisition of tissue identity. GFP, TUJ1, SOX2, SOX17 and overlap as well as merged constitute zoomed-in regions of tissues depicted in red squares in the tiles. White arrowheads in insets depict co-localization of GFP and the respective tissue marker. Scale bars for tiles and zoomed-in regions are indicated.



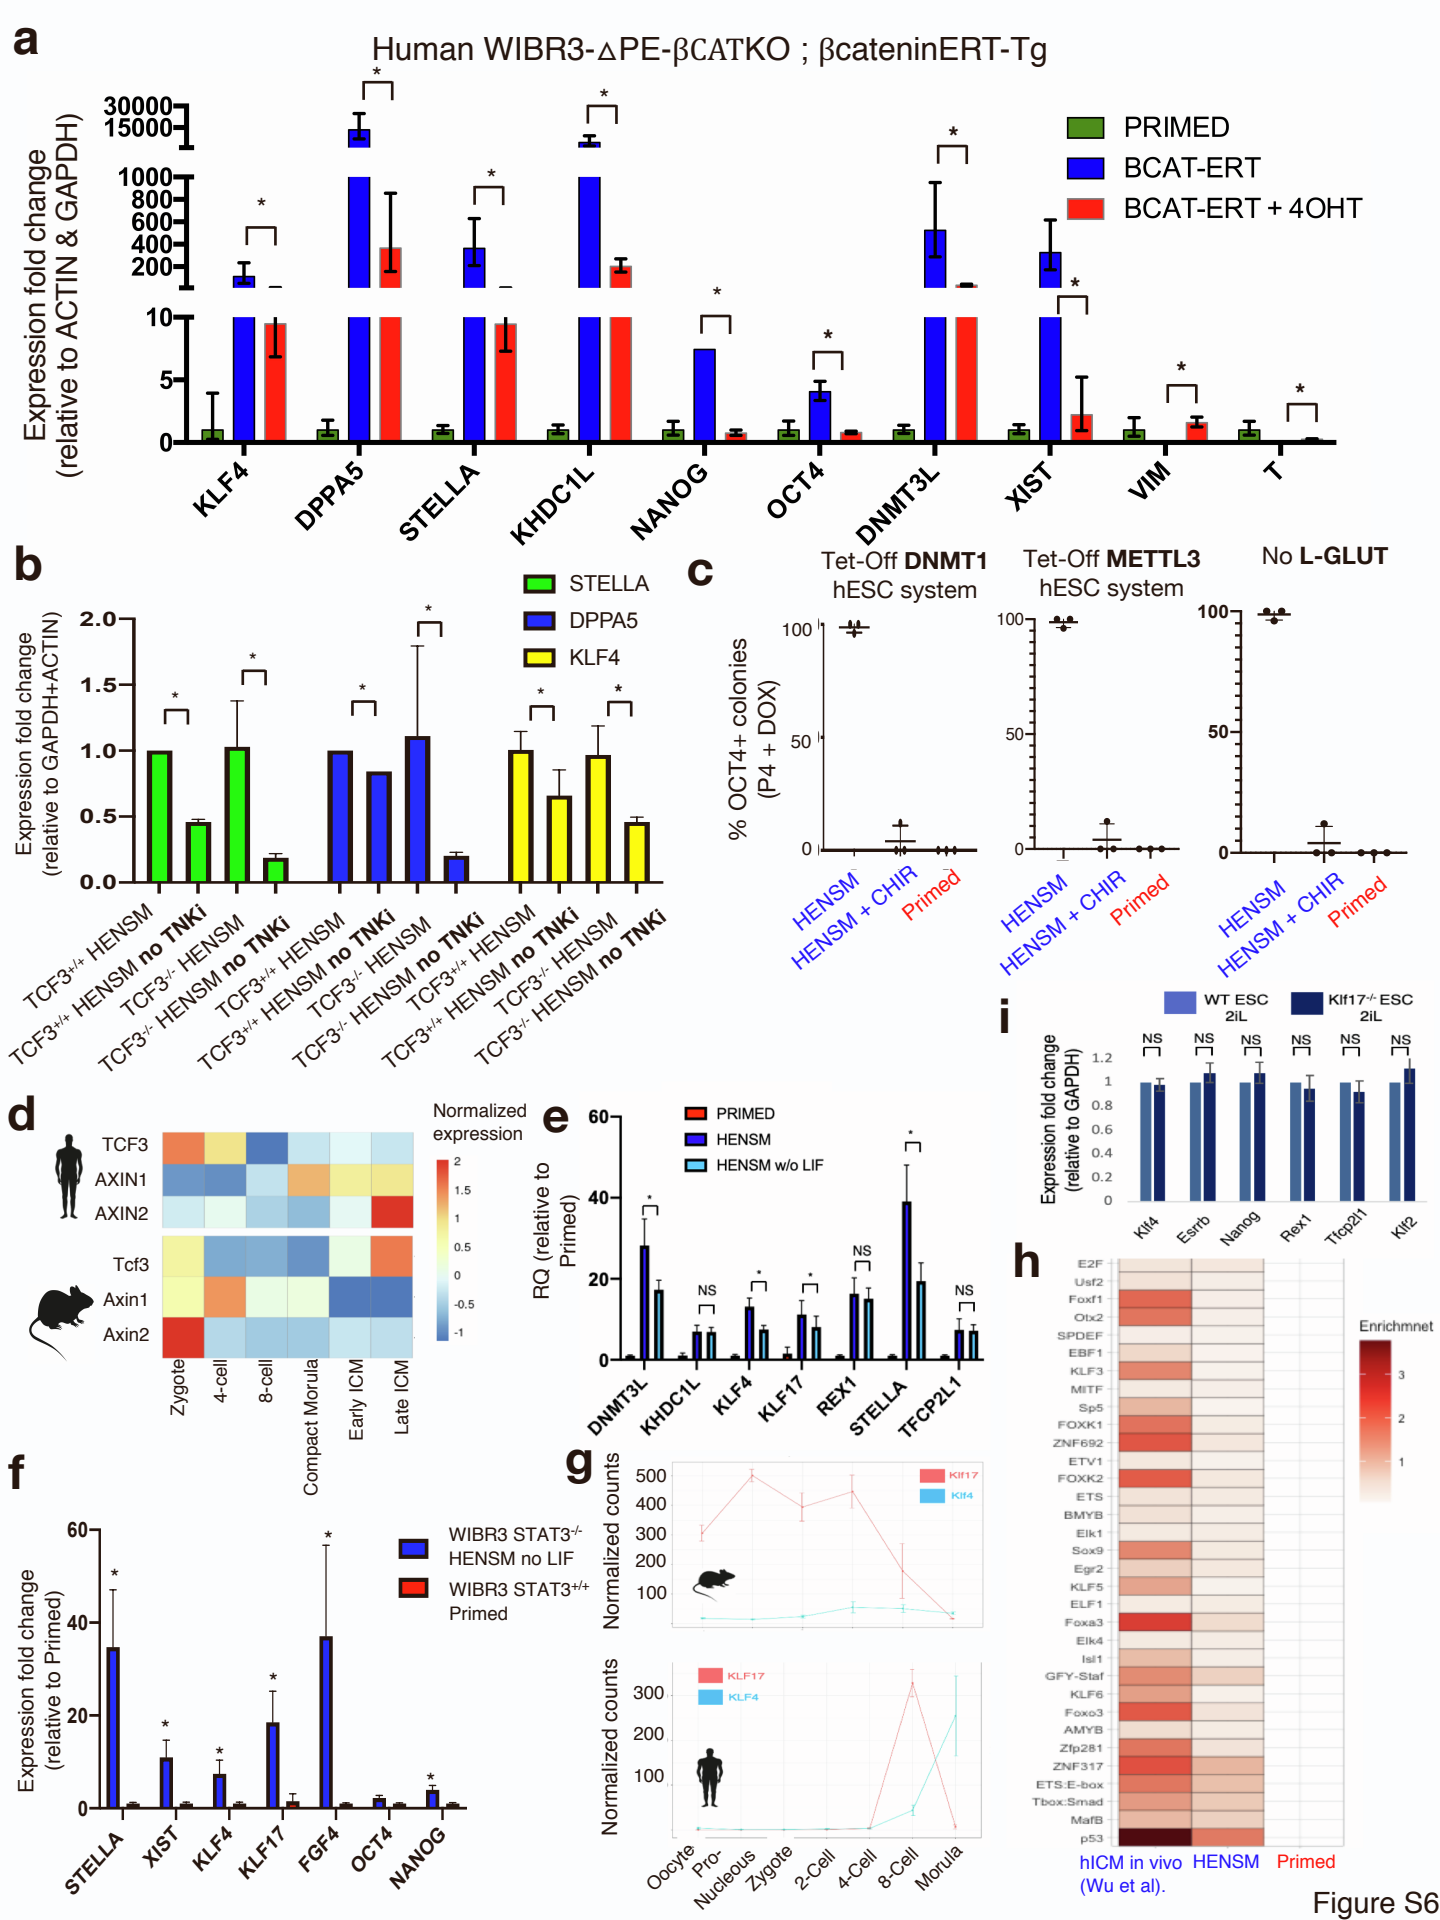

Figure S6

**Figure S6. Nuclear  $\beta$ CATENIN signaling induces priming of human PSCs.** Related to Figure 5.

**a.** RT-PCR analysis for naïve pluripotency marker expression in Human WIBR3- $\Delta$ PE- $\beta$ CATKO ;  $\beta$ CateninERT-Tg line before and after Tamoxifen addition for 48 hours. Values were normalized to ACTIN and GAPDH. Primed expression levels were set as 1. \*t-test  $p$  Value < 0.01. Naïve pluripotency marker expression was significantly downregulated upon induction of nuclear  $\beta$ CATENIN signaling in human PSCs. **b.** RT-PCR analysis for naïve pluripotency marker expression in the indicated conditions, with and without TNKi, in TCF3 WT and KO hESCs. Values were normalized to ACTIN and GAPDH. \*t-test  $p$  Value < 0.01. TCF3<sup>+/+</sup> HENSM expression levels were set as 1. **c.** Percentage of OCT4+ cells at P4 from TET-OFF-DNMT1, DNMT1-TET-OFF cell lines and OCT4-GFP cells in the absence of exogenous L-Glut in primed, naïve HENSM, and naïve HENSM supplemented with 1.5 $\mu$ M CHIR99021. **d.** Normalized expression pattern of TCF3 and AXIN1/2 transcripts in mouse and human, as reported in previous single-cell RNA-seq measurement in mouse and human embryos. **e.** RT-PCR analysis for naïve pluripotency marker expression in the indicated naïve and primed conditions, with and without LIF. Values were normalized to ACTIN and GAPDH. Primed expression levels were set as 1. \*t-test  $p$  Value < 0.01; NS- not significant. **f.** RT-PCR analysis for naïve pluripotency marker expression in the indicated lines and conditions. Values were normalized to ACTIN and GAPDH. Primed expression levels were set as 1. \*t-test  $p$  Value < 0.01; NS- not significant. Naïve pluripotency marker remain highly expressed in STAT3 KO ESCs in HENSM conditions, when compared to primed cells that do not express at all these specific markers. **g.** KLF4 and KLF17 relative abundance in pre-implantation stages as measured *in vivo* by scRNA-seq. Please note that KLF17 is not expressed in the mouse ICM (but rather at 2 Cell stage in the mouse), while in humans it is rather upregulated at the morula-ICM stages. **h.** Motif enrichment in human ICM and HENSM commonly enriched accessible chromatin regions. Motif families are indicated at the right. Shades represent enrichment fold-change.

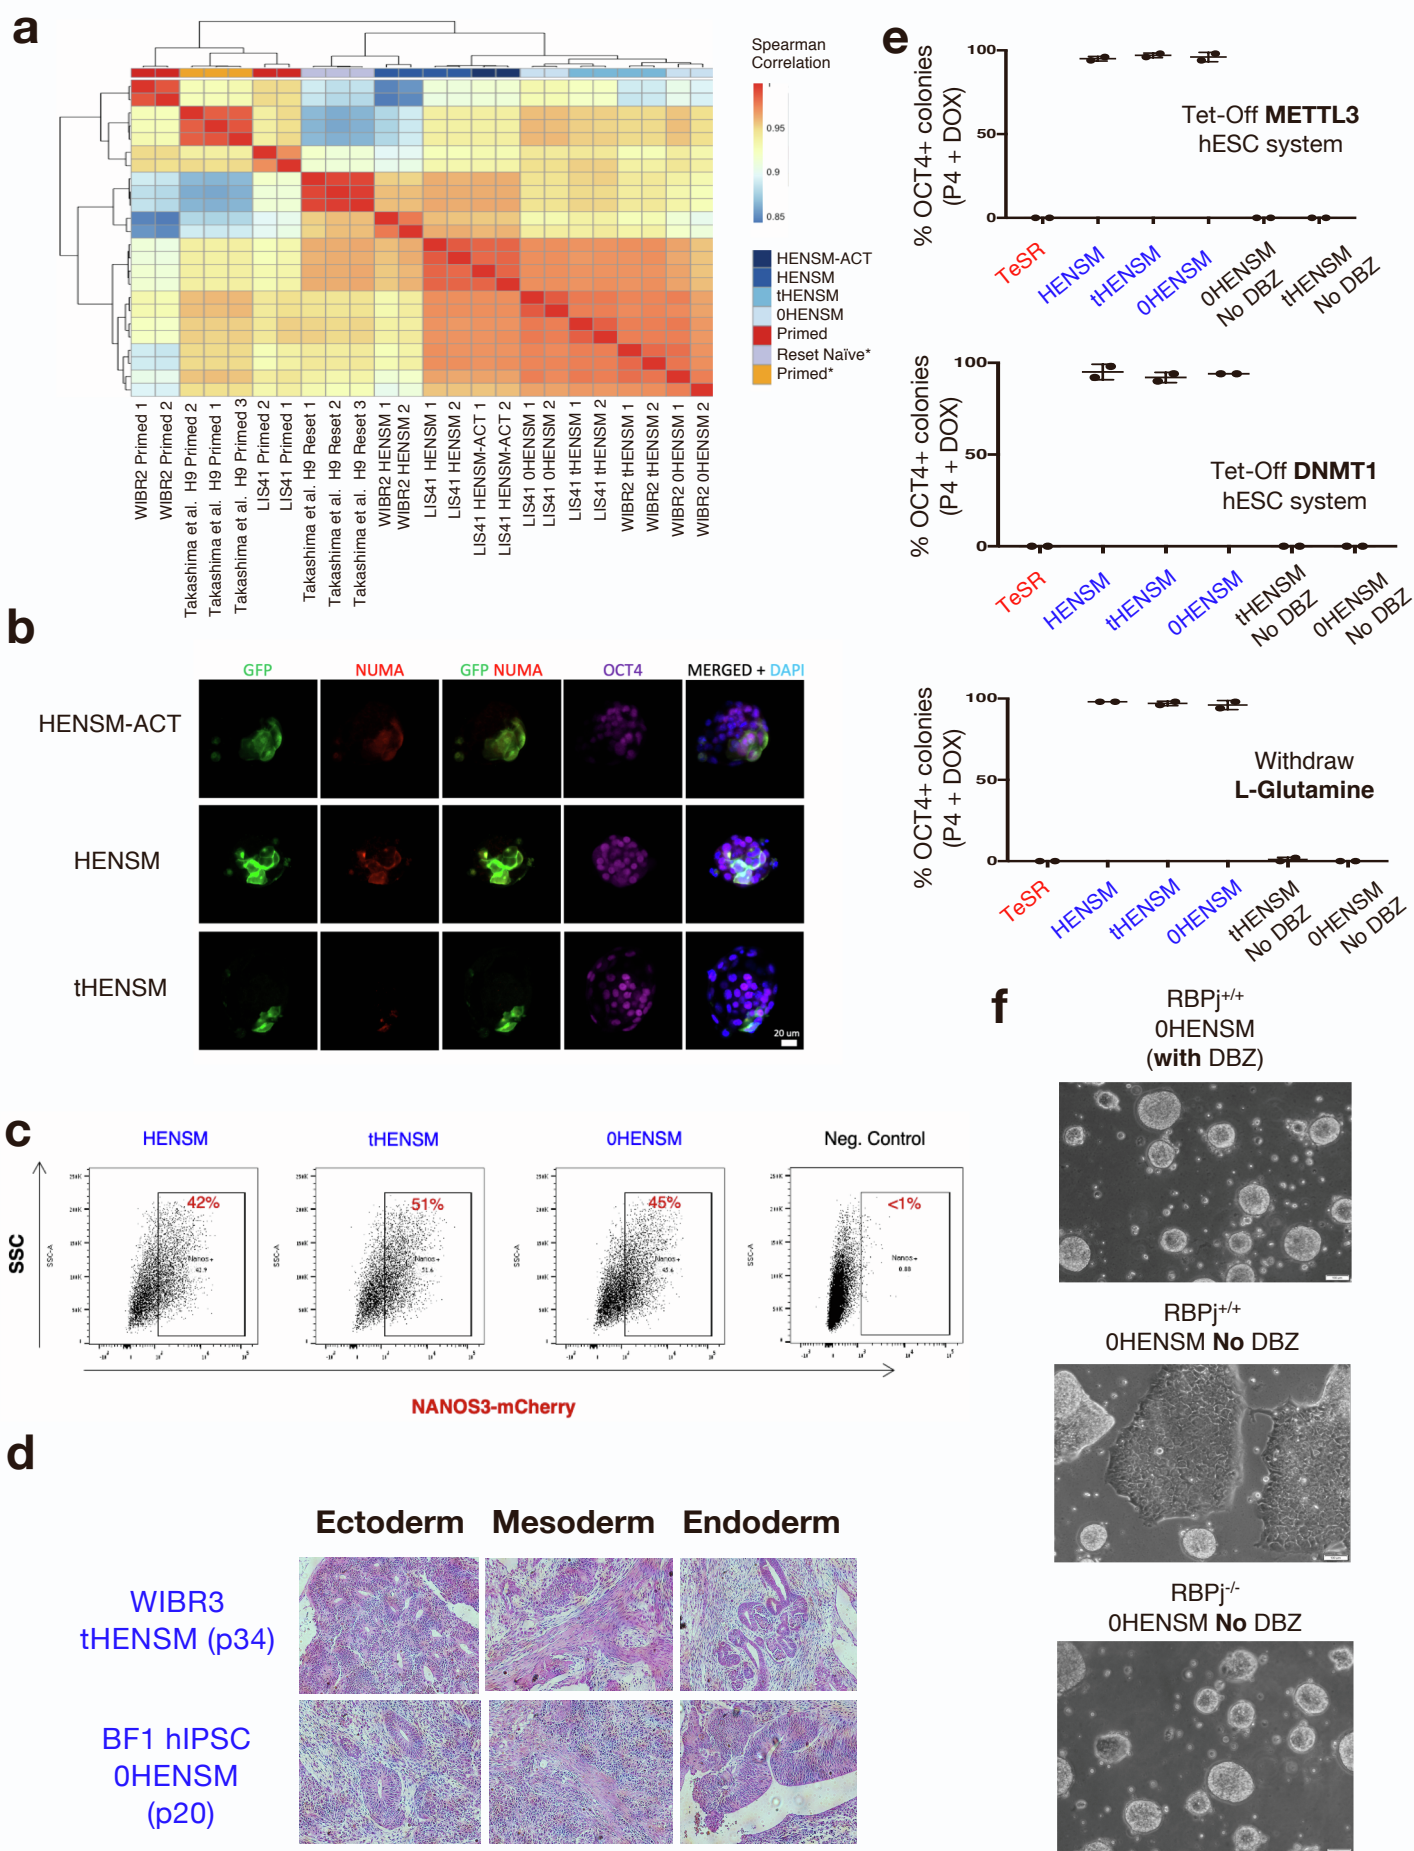

Figure S7

**Figure S7. Alternative HENSM conditions for human naïve-like PSCs without using ERKi.** Related to Figure 7.

**a.** Spearman correlation matrix of primed samples, along HENSM, HENSM-ACT, tHENSM and 0HENSM samples, as well as previously published naïve and primed samples (Takashima et al, 2014). **b.** Representative immunostaining images of mouse blastocysts 48h after GFP labeled human naïve P53 null hiPSCs expanded in the indicated conditions, were micro-aggregated with mouse 2-Cell embryos. **c.** Competence for human naïve PSCs for differentiating into PGCLCs *in vitro* was assayed for NANOS3-mCherry knock in reporter line expanded for at least 3 passages in HENSM, tHENSM or 0HENSM conditions. Percentages of NANOS3+ cells detected by FACS analysis are shown. **d.** Representative images of teratoma formation from cell expanded in tHENSM and 0HENSM conditions. **e.** Percentage of OCT4-GFP+ cells at P4 from WIBR3-OCT4-GFP cells in HENSM, tHENSM and 0HENSM conditions without METTL3, DNMT1 or exogenously added L-Glutamine. **f.** Phase-contrast images of RBPj<sup>+/+</sup> and RBPj<sup>-/-</sup> WIBR3 hESCs upon removal of DBZ from 0HENSM conditions.
